# Supplementary material for: Depleting Trim28 in adult mice is well tolerated and reduces levels of α-synuclein and tau
Source: eLife journal article supplement (doi:10.7554/elife.36768), 2018-06-04
Supplement: supp [file elife-36768-supp-v1.zip]

Archive with 8 entries (8 files):
- elife_poa_e36768_Figure_4_figure_supplement_3.jpg
- elife_poa_e36768_Figure_4_figure_supplement_2.jpg
- elife_poa_e36768_Figure_1_figure_supplement_1.jpg
- elife_poa_e36768_Figure_2_figure_supplement_2.jpg
- elife_poa_e36768_Transparent_Reporting_File.pdf
- elife_poa_e36768_Figure_2_figure_supplement_1.jpg
- elife_poa_e36768_Supplementary_File_1.xlsx
- elife_poa_e36768_Figure_4_figure_supplement_1.jpg
