# Supplementary material for: Depleting Trim28 in adult mice is well tolerated and reduces levels of α-synuclein and tau
Source: eLife journal article supplement (doi:10.7554/elife.36768), 2018-06-04
Supplement: supp [file elife-36768-supp-v1.zip › elife_poa_e36768_Supplementary_File_1.xlsx]

## Sheet: Statistical Summary of Results
Figure	Assay	Measurement	Statistical Test	n	Comparison	F (DFn, DFd) or other	P value (or other)
Fig. 1A	Western Blot - HEK293T cells (drug)	α-Syn levels	Student's t-test (two-tailed)	5,5	Viomeillin vs. DMSO	t=2.648 df=8	0.0294
		Tau levels	Student's t-test (two-tailed)	5,5	Viomeillin vs. DMSO	t=4.145 df=8	0.0032
	Western Blot - HEK293T cells (siRNA)	α-Syn levels	Student's t-test (two-tailed)	5,5	siUBC9 vs. siScramble	t=4.295 df=8	0.0026
		Tau levels	Student's t-test (two-tailed)	5,5	siUBC9 vs. siScramble	t=3.666 df=8	0.0063
Fig. 1B	IP-Western Blot - HEK293T cells (SUMO conjugation)	SUMO2:α-Syn conjugates	Student's t-test (two-tailed)	3,3	shTRIM28 vs. shScramble	t=2.813 df=4	0.0482
			One-Way ANOVA	3,3,3	TRIM28 overexpression	F (2, 6) = 9.082	0.0153
			Holm-Sidak Post-hoc test		TRIM28 vs. CTRL		0.0239
					TRIM28-MT vs. CTRL		0.8013
		SUMO2:Tau conjugates	Student's t-test (two-tailed)	3,3	shTRIM28 vs. shScramble	t=11.49 df=4	0.0003
			One-Way ANOVA	3,3,3	TRIM28 overexpression	F (2, 6) = 9.29	0.0145
			Holm-Sidak Post-hoc test		TRIM28 vs. CTRL		0.0127
					TRIM28-MT vs. CTRL		0.4022
Fig. 1C	IP-Western Blot - mouse brain (SUMO conjugation)	SUMO2/3:α-Syn conjugates	Student's t-test (two-tailed)	7,7	WT vs. Trim28+/-	t=2.52 df=12	0.0269
		SUMO2/3:Tau conjugates	Student's t-test (two-tailed)	6,6	WT vs. Trim28+/-	t=3.576 df=10	0.005
Fig.1-figure supplement 1D	Western blot - Mouse brain	Protein levels	Two-Way ANOVA	9,9	Genotype	F (1, 48) = 48.74	0.0001
		Trim28 levels	Sidak's multiple comparison test	9,9	WT vs. Trim28E3MT/+		<0.0001
		α-Syn levels	Sidak's multiple comparison test	9,9	WT vs. Trim28E3MT/+		0.0039
		Tau levels	Sidak's multiple comparison test	9,9	WT vs. Trim28E3MT/+		0.0023
	qPCR - Mouse brain	RNA expression (Trim28, Snca and Mapt)	Two-Way ANOVA		Genotype	F (1, 18) = 0.1844	0.6727
Fig. 2B	Survival	Viability (weeks post tamoxifen injection)	Log-rank (Mantel-Cox) test	33,13,14,18	Genotype	Chi square: 1.394	0.707
Fig. 2C	qPCR - Different brain tissues	Trim28 expression	Two-Way ANOVA	8,6,9,7,9,7	Genotype	F (1, 40) = 230.7	0.0001
			Sidak's multiple comparison test	8,6	Midbrain (CTRL vs. AKO)		<0.0001
				9,7	Cortex (CTRL vs. AKO)		<0.0001
				9,7	Hippocampus (CTRL vs. AKO)		<0.0001
Fig. 2D	Western blot - Mouse hippocampus	α-Syn levels	Student's t-test (two-tailed)	13,12	CTRL vs. AKO	t=2.102 df=23	0.0467
		Tau levels	Student's t-test (two-tailed)	13,12	CTRL vs. AKO	t=3.979 df=23	0.0006
		Trim28 levels	Student's t-test (two-tailed)	13,12	CTRL vs. AKO	t=16.7 df=23	<0.0001
Fig. 2-figure supplement 1B	qPCR - Mouse brain (caudal cortex/hippocampus)	Trim28 expression	Student's t-test (two-tailed)	4,6	shTrim28 vs. shScramble	t=6.294 df=3	0.0081
Fig. 2-figure supplement 1C	Cresyl violet histology - Mouse cortex	Normalized width	Student's t-test (two-tailed)	4,6	shTrim28 vs. shScramble	t=0.3362 df=8	0.7454
	Cresyl violet histology - Mouse hippocampus (CA1)	Normalized width	Student's t-test (two-tailed)	4,6	shTrim28 vs. shScramble	t=0.6223 df=8	0.551
	GFAP Immunohistochemistry - Mouse cortex	GFAP Immunoreactivity	Student's t-test (two-tailed)	4,6	shTrim28 vs. shScramble	t=0.9531 df=8	0.3684
	GFAP Immunohistochemistry - Mouse hippocampus	GFAP Immunoreactivity	Student's t-test (two-tailed)	4,6	shTrim28 vs. shScramble	t=0.9677 df=8	0.3615
Fig. 2-figure supplement 2A	Western blot - Mouse midbrain	α-Syn levels	Student's t-test (two-tailed)	13,12	CTRL vs. AKO	t=2.228 df=23	0.0359
		Tau levels	Student's t-test (two-tailed)	13,12	CTRL vs. AKO	t=2.555 df=23	0.0177
		Trim28 levels	Student's t-test (two-tailed)	13,12	CTRL vs. AKO	t=16.55 df=23	<0.0001
Fig. 2-figure supplement 2B	Western blot - Mous hippocampus (correlation)	Protein level correlation	Linear regression	25,25	α-Syn vs. Trim28 levels	F (1,23) = 7.169	R2 = 0.2376
					Tau vs. Trim28 levels	F (1,23) = 14.04	R2 = 0.3791
	Western blot - Mous midbrain (correlation)	Protein level correlation	Linear regression	25,25	α-Syn vs. Trim28 levels	F (1,23) = 10.48	R2 = 0.3229
					Tau vs. Trim28 levels	F (1,23) = 10.97	R2 = 0.3129
Fig. 2-figure supplement 2C	qPCR - Mouse organs	Trim28 expression	Two-Way ANOVA	8,6,7,6,8,7	Genotype	F (1, 36) = 137.9	<0.0001
			Sidak's multiple comparison test	8,6	Heart (WT vs. AKO)		<0.0001
			Sidak's multiple comparison test	7,6	Liver (WT vs. AKO)		<0.0001
			Sidak's multiple comparison test	8,7	Spleen (WT vs. AKO)		<0.0001
Fig. 3A	Open Field Assay	Total distance	One-Way ANOVA	33,12,15,18	Genotype	F (3, 74) = 3.795	0.0137
					Ctrl +TAM vs. UBC-CreERT2;Trim28f/f + Veh		0.0899
					Ctrl +TAM vs. UBC-CreERT2;Trim28f/+ + TAM		0.6818
					Ctrl +TAM vs. UBC-CreERT2;Trim28f/f + TAM		0.1434
					UBC-CreERT2;Trim28f/f + Veh vs. UBC-CreERT2;Trim28f/+ + TAM		0.0474
					UBC-CreERT2;Trim28f/f + Veh vs. UBC-CreERT2;Trim28f/f + TAM		0.6818
					UBC-CreERT2;Trim28f/+ + TAM vs. UBC-CreERT2;Trim28f/f + TAM		0.0899
		Speed	One-Way ANOVA	33,12,15,18	Genotype	F (3, 74) = 4.034	0.0103
					Ctrl +TAM vs. UBC-CreERT2;Trim28f/f + Veh		0.0823
					Ctrl +TAM vs. UBC-CreERT2;Trim28f/+ + TAM		0.7275
					Ctrl +TAM vs. UBC-CreERT2;Trim28f/f + TAM		0.075
					UBC-CreERT2;Trim28f/f + Veh vs. UBC-CreERT2;Trim28f/+ + TAM		0.0673
					UBC-CreERT2;Trim28f/f + Veh vs. UBC-CreERT2;Trim28f/f + TAM		0.886
					UBC-CreERT2;Trim28f/+ + TAM vs. UBC-CreERT2;Trim28f/f + TAM		0.0591
		Vertical activity	One-Way ANOVA	33,12,15,18	Genotype	F (3, 74) = 2.368	0.1483
		Time in center	One-Way ANOVA	33,12,15,18	Genotype	F (3, 73) = 1.638	0.188
Fig. 3B	Parallel Rod Footslip	Footslips/Distance traveled	One-Way ANOVA	33,12,15,18	Genotype	F (3, 73) = 0.9882	0.4032
		Time immobile	One-Way ANOVA	33,12,15,18	Genotype	F (3, 73) = 0.9489	0.4216
Fig. 3C	Pole Test	Time to turn	One-Way ANOVA	33,12,15,18	Genotype	F (3, 73) = 0.4297	0.7324
		Time to descend	One-Way ANOVA	33,12,15,18	Genotype	F (3, 73) = 0.3952	0.7568
Fig. 3D	Elevated Plus Maze	Duration	Two-Way ANOVA	22,5,12,9	Genotype	F (3, 88) = 0.1097	0.9542
Fig. 3E	Conditioned Fear	Time spent freezing	Two-Way ANOVA	22,5,12,9	Genotype	F (3, 88) = 3.472	0.0194
			Holm-Sidak Post-hoc test		Ctrl +TAM vs. UBC-CreERT2;Trim28f/f + Veh		0.3965
					Ctrl +TAM vs. UBC-CreERT2;Trim28f/+ + TAM		0.8944
					Ctrl +TAM vs. UBC-CreERT2;Trim28f/f + TAM		0.7007
					UBC-CreERT2;Trim28f/f + Veh vs. UBC-CreERT2;Trim28f/+ + TAM		0.3965
					UBC-CreERT2;Trim28f/f + Veh vs. UBC-CreERT2;Trim28f/f + TAM		0.7007
					UBC-CreERT2;Trim28f/+ + TAM vs. UBC-CreERT2;Trim28f/f + TAM		0.7007
Fig. 3F	Novel Object Recognition	Discrimination index	One-Way ANOVA	22,5,12,9	Genotype	F (3, 44) = 1.588	0.2058
Fig. 3G	Hole Poke	Sequential nose pokes	Two-Way ANOVA	22,5,12,9	Genotype	F (3, 176) = 0.5382	0.6567
Fig. 3H	Rotarod	Latency to fall	Two-Way ANOVA	26,7,11,10	Genotype	F (3, 50) = 1.779	0.1632
Fig. 4C	Cresyl violet histology - Mouse cortex	Normalized width	Student's t-test (two-tailed)	3,3	Genotype	t=0.2918 df=4	0.7849
	GFAP Immunohistochemistry - Mouse cortex	GFAP Immunoreactivity	Student's t-test (two-tailed)	3,3	Genotype	t=2.316 df=4	0.0815
	Cresyl violet histology - Mouse hippocampus (CA1)	Normalized width	Student's t-test (two-tailed)	3,3	Genotype	t=0.5599 df=4	0.6054
	GFAP Immunohistochemistry - Mouse hippocampus	GFAP Immunoreactivity	Student's t-test (two-tailed)	3,3	Genotype	t=0.7224 df=4	0.51
Fig. 4-figure supplement 1B	qPCR - Trim28 downstream targets	Expression	Multiple t-tests with 10% FDR correction	4,4	Gene		q value
					Mkrn3	t=0.5222 df=6	0.779707
					Tcf5	t=2.737 df=6	0.149066
					Pcdhb6	t=0.3084 df=6	0.844997
					Klhdc4	t=2.348 df=6	0.167819
					Stac2	t=2.982 df=6	0.149066
					Smad3	t=1.152 df=6	0.515956
					Cdkn1c	t=1.289 df=6	0.515956
					C1ql2	t=0.6441 df=6	0.779707
