# Supplementary figures and images for: Depleting Trim28 in adult mice is well tolerated and reduces levels of α-synuclein and tau
Source: eLife journal article supplement (doi:10.7554/elife.36768), 2018-06-04

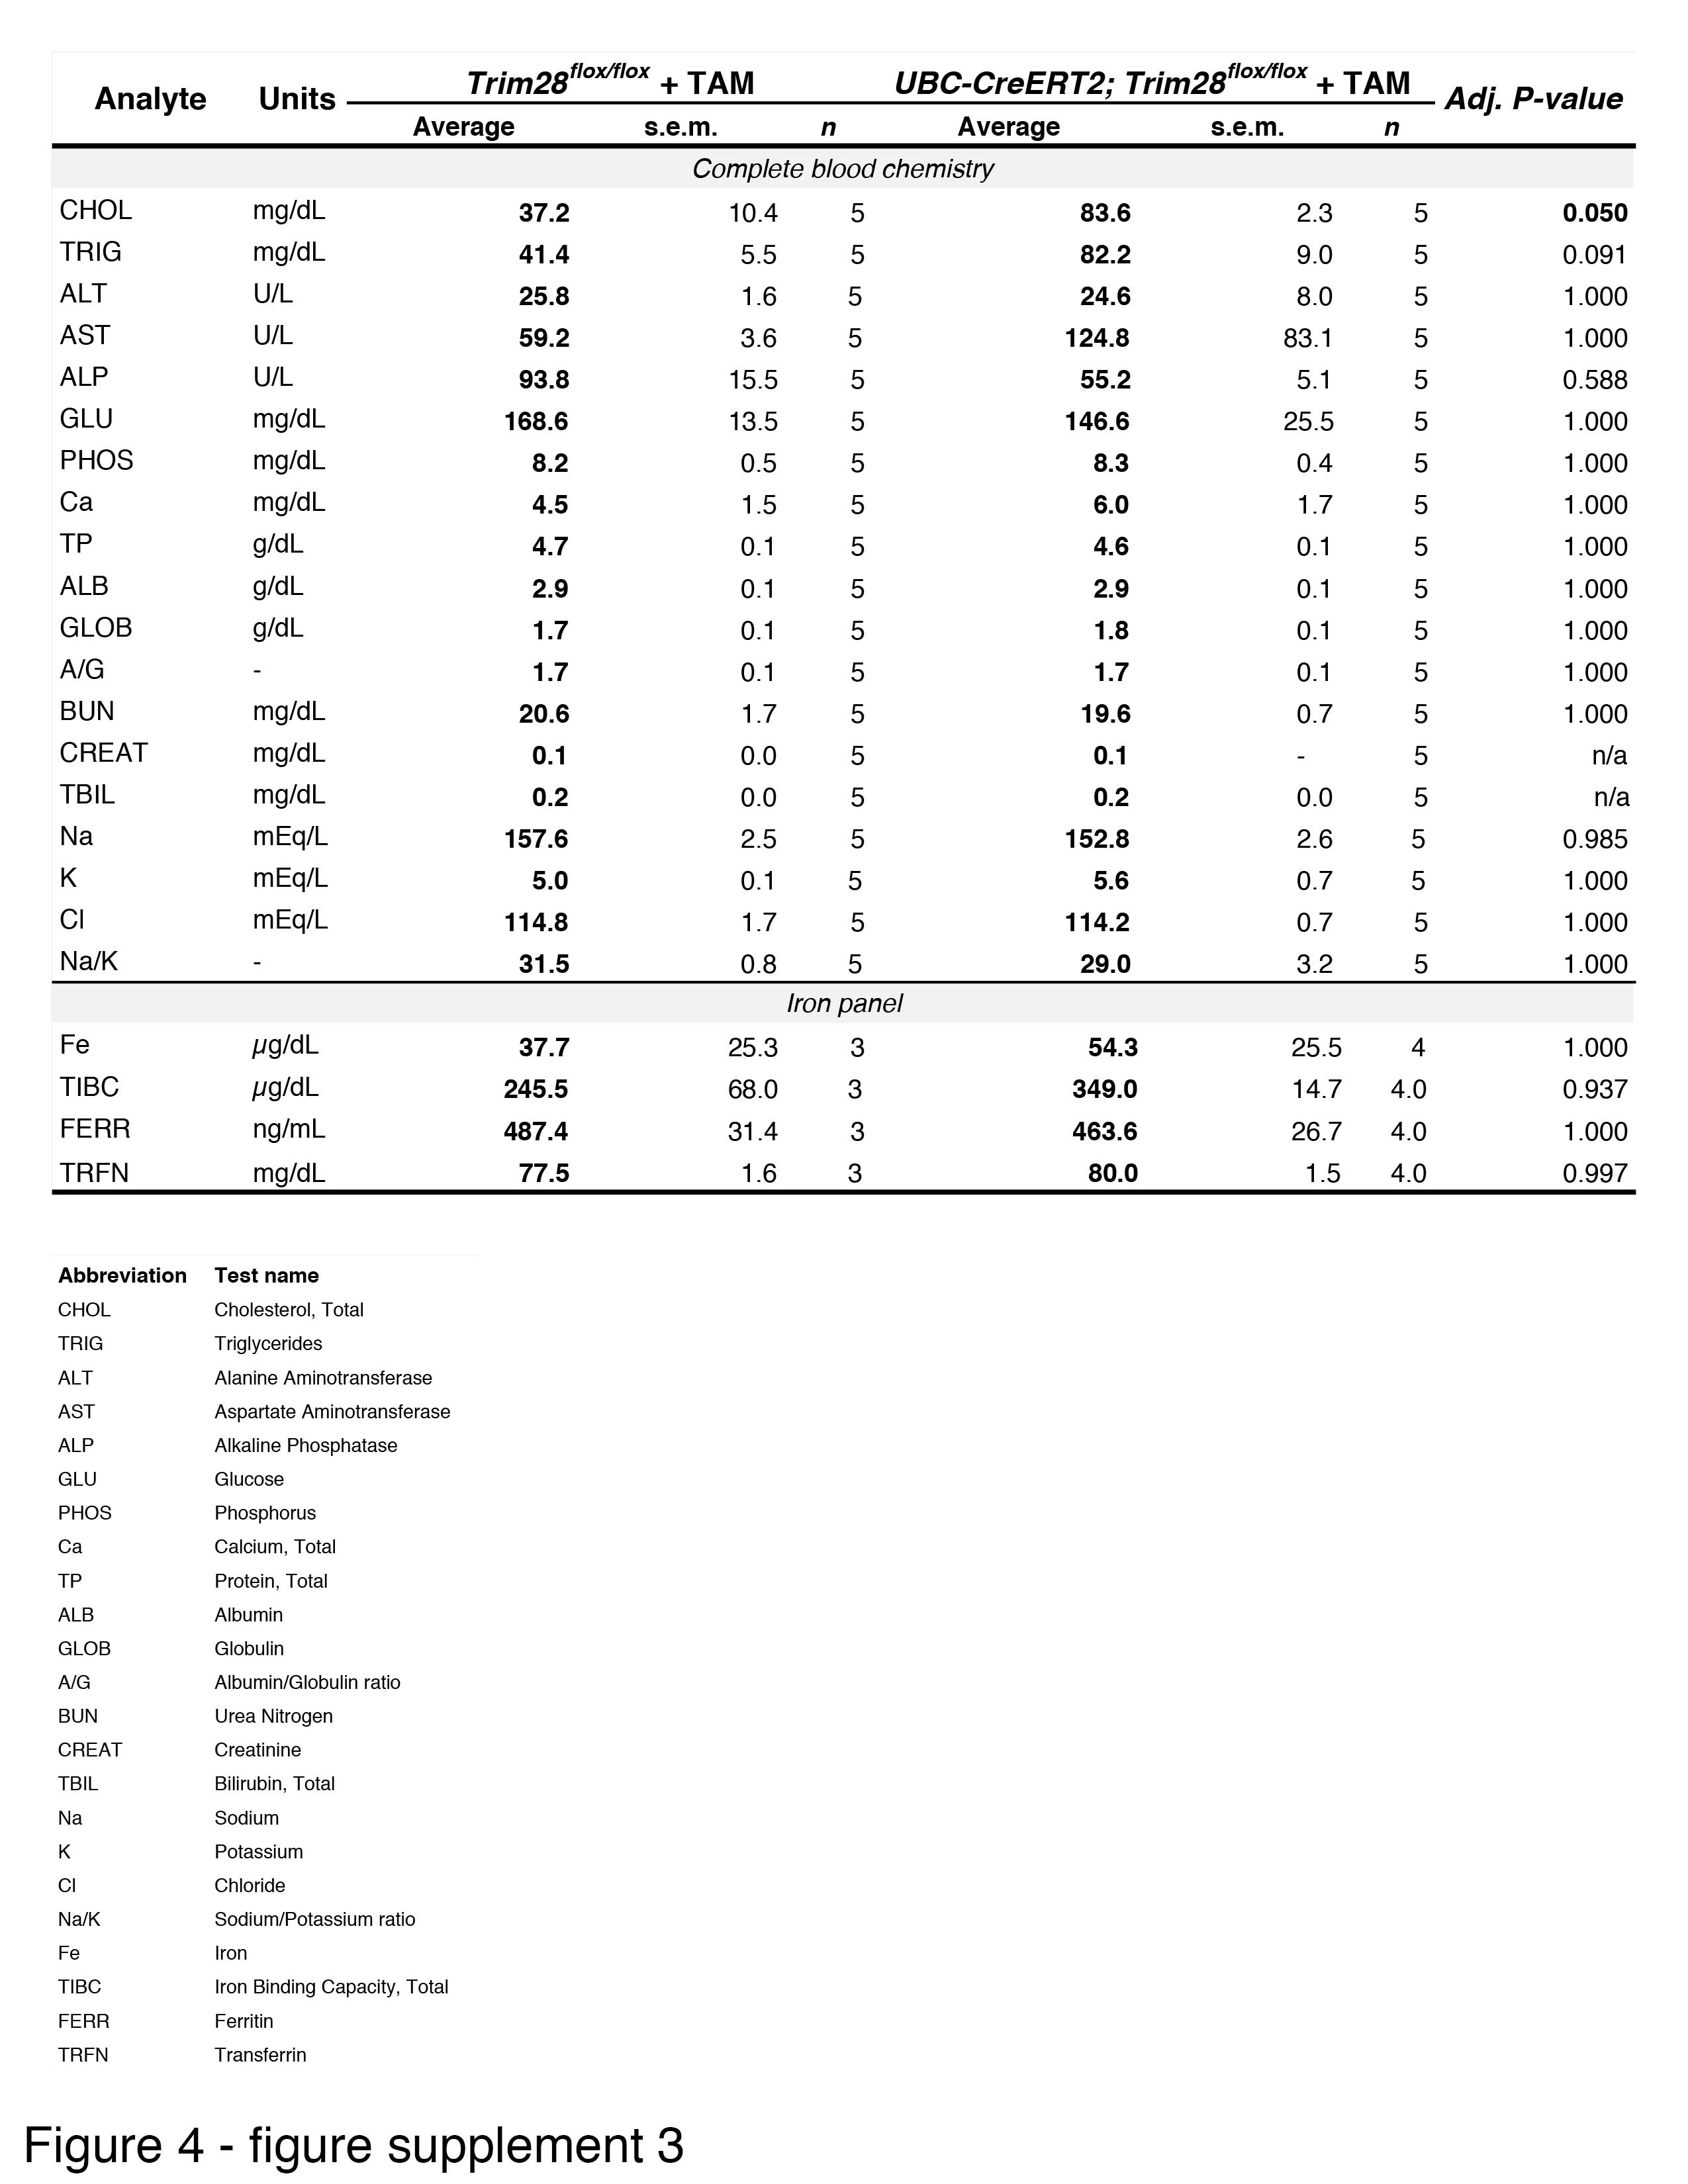

Supplement: supp [file elife-36768-supp-v1.zip › elife_poa_e36768_Figure_4_figure_supplement_3.jpg]

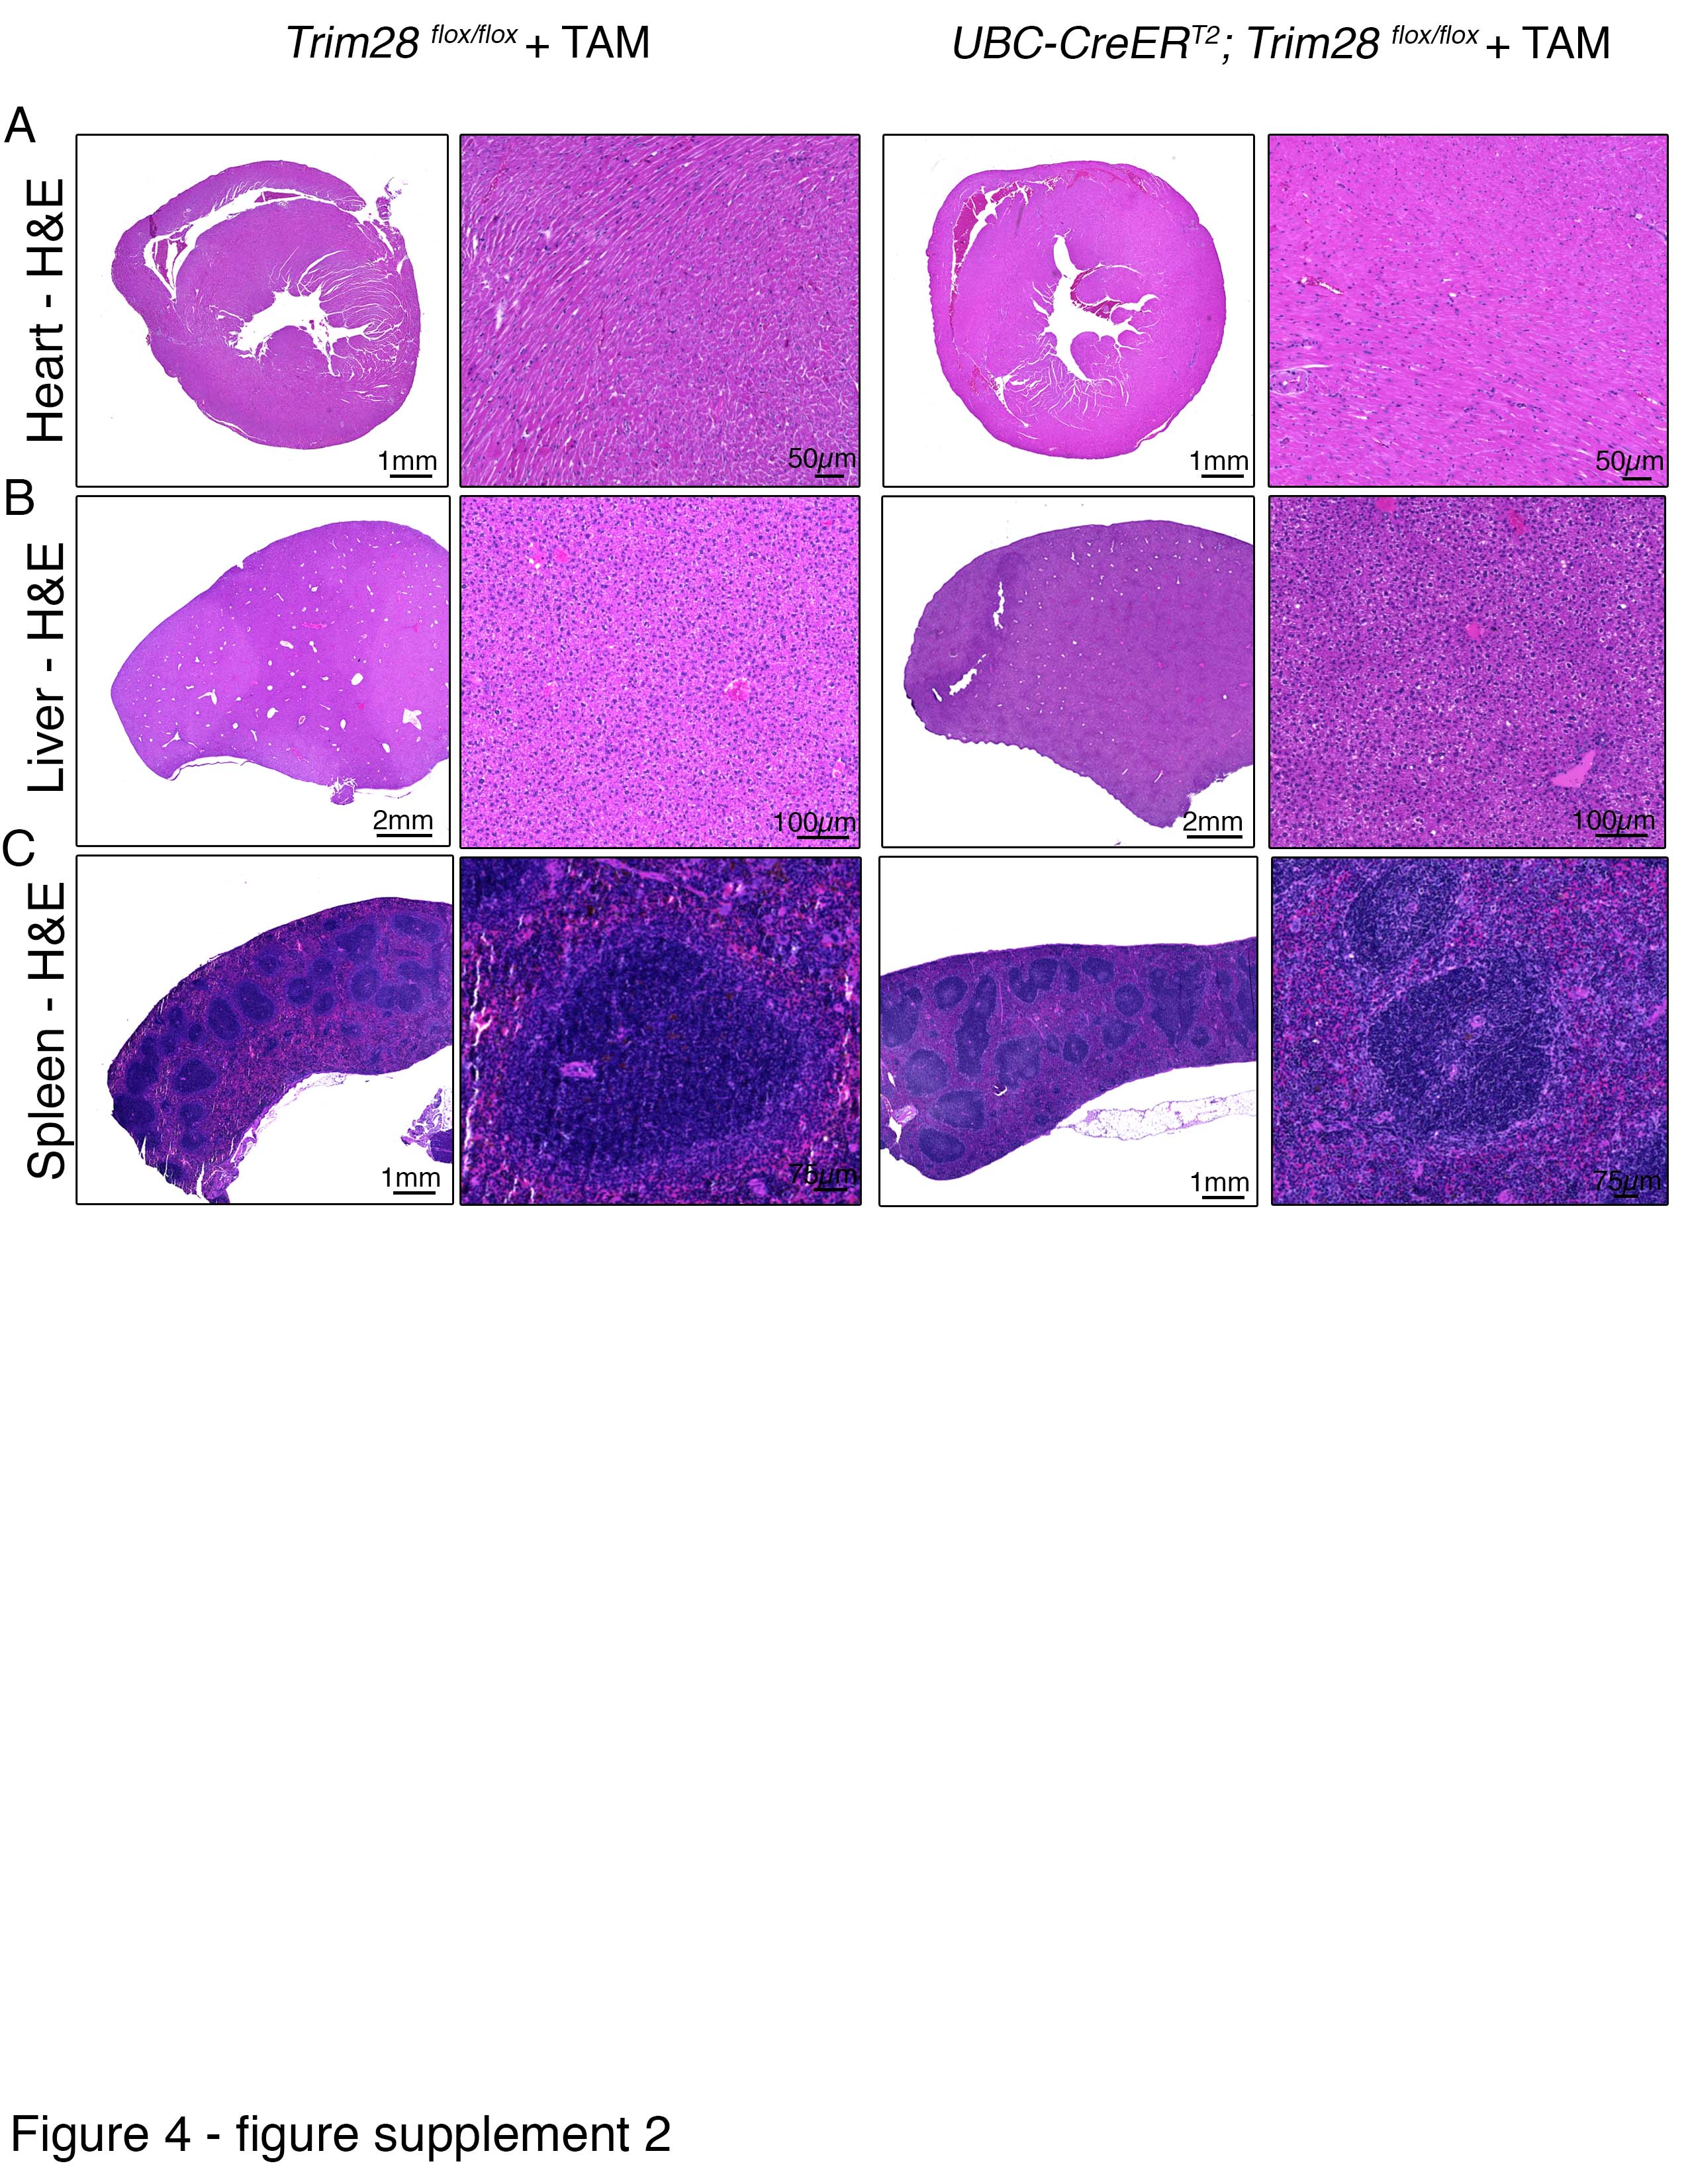

Supplement: supp [file elife-36768-supp-v1.zip › elife_poa_e36768_Figure_4_figure_supplement_2.jpg]

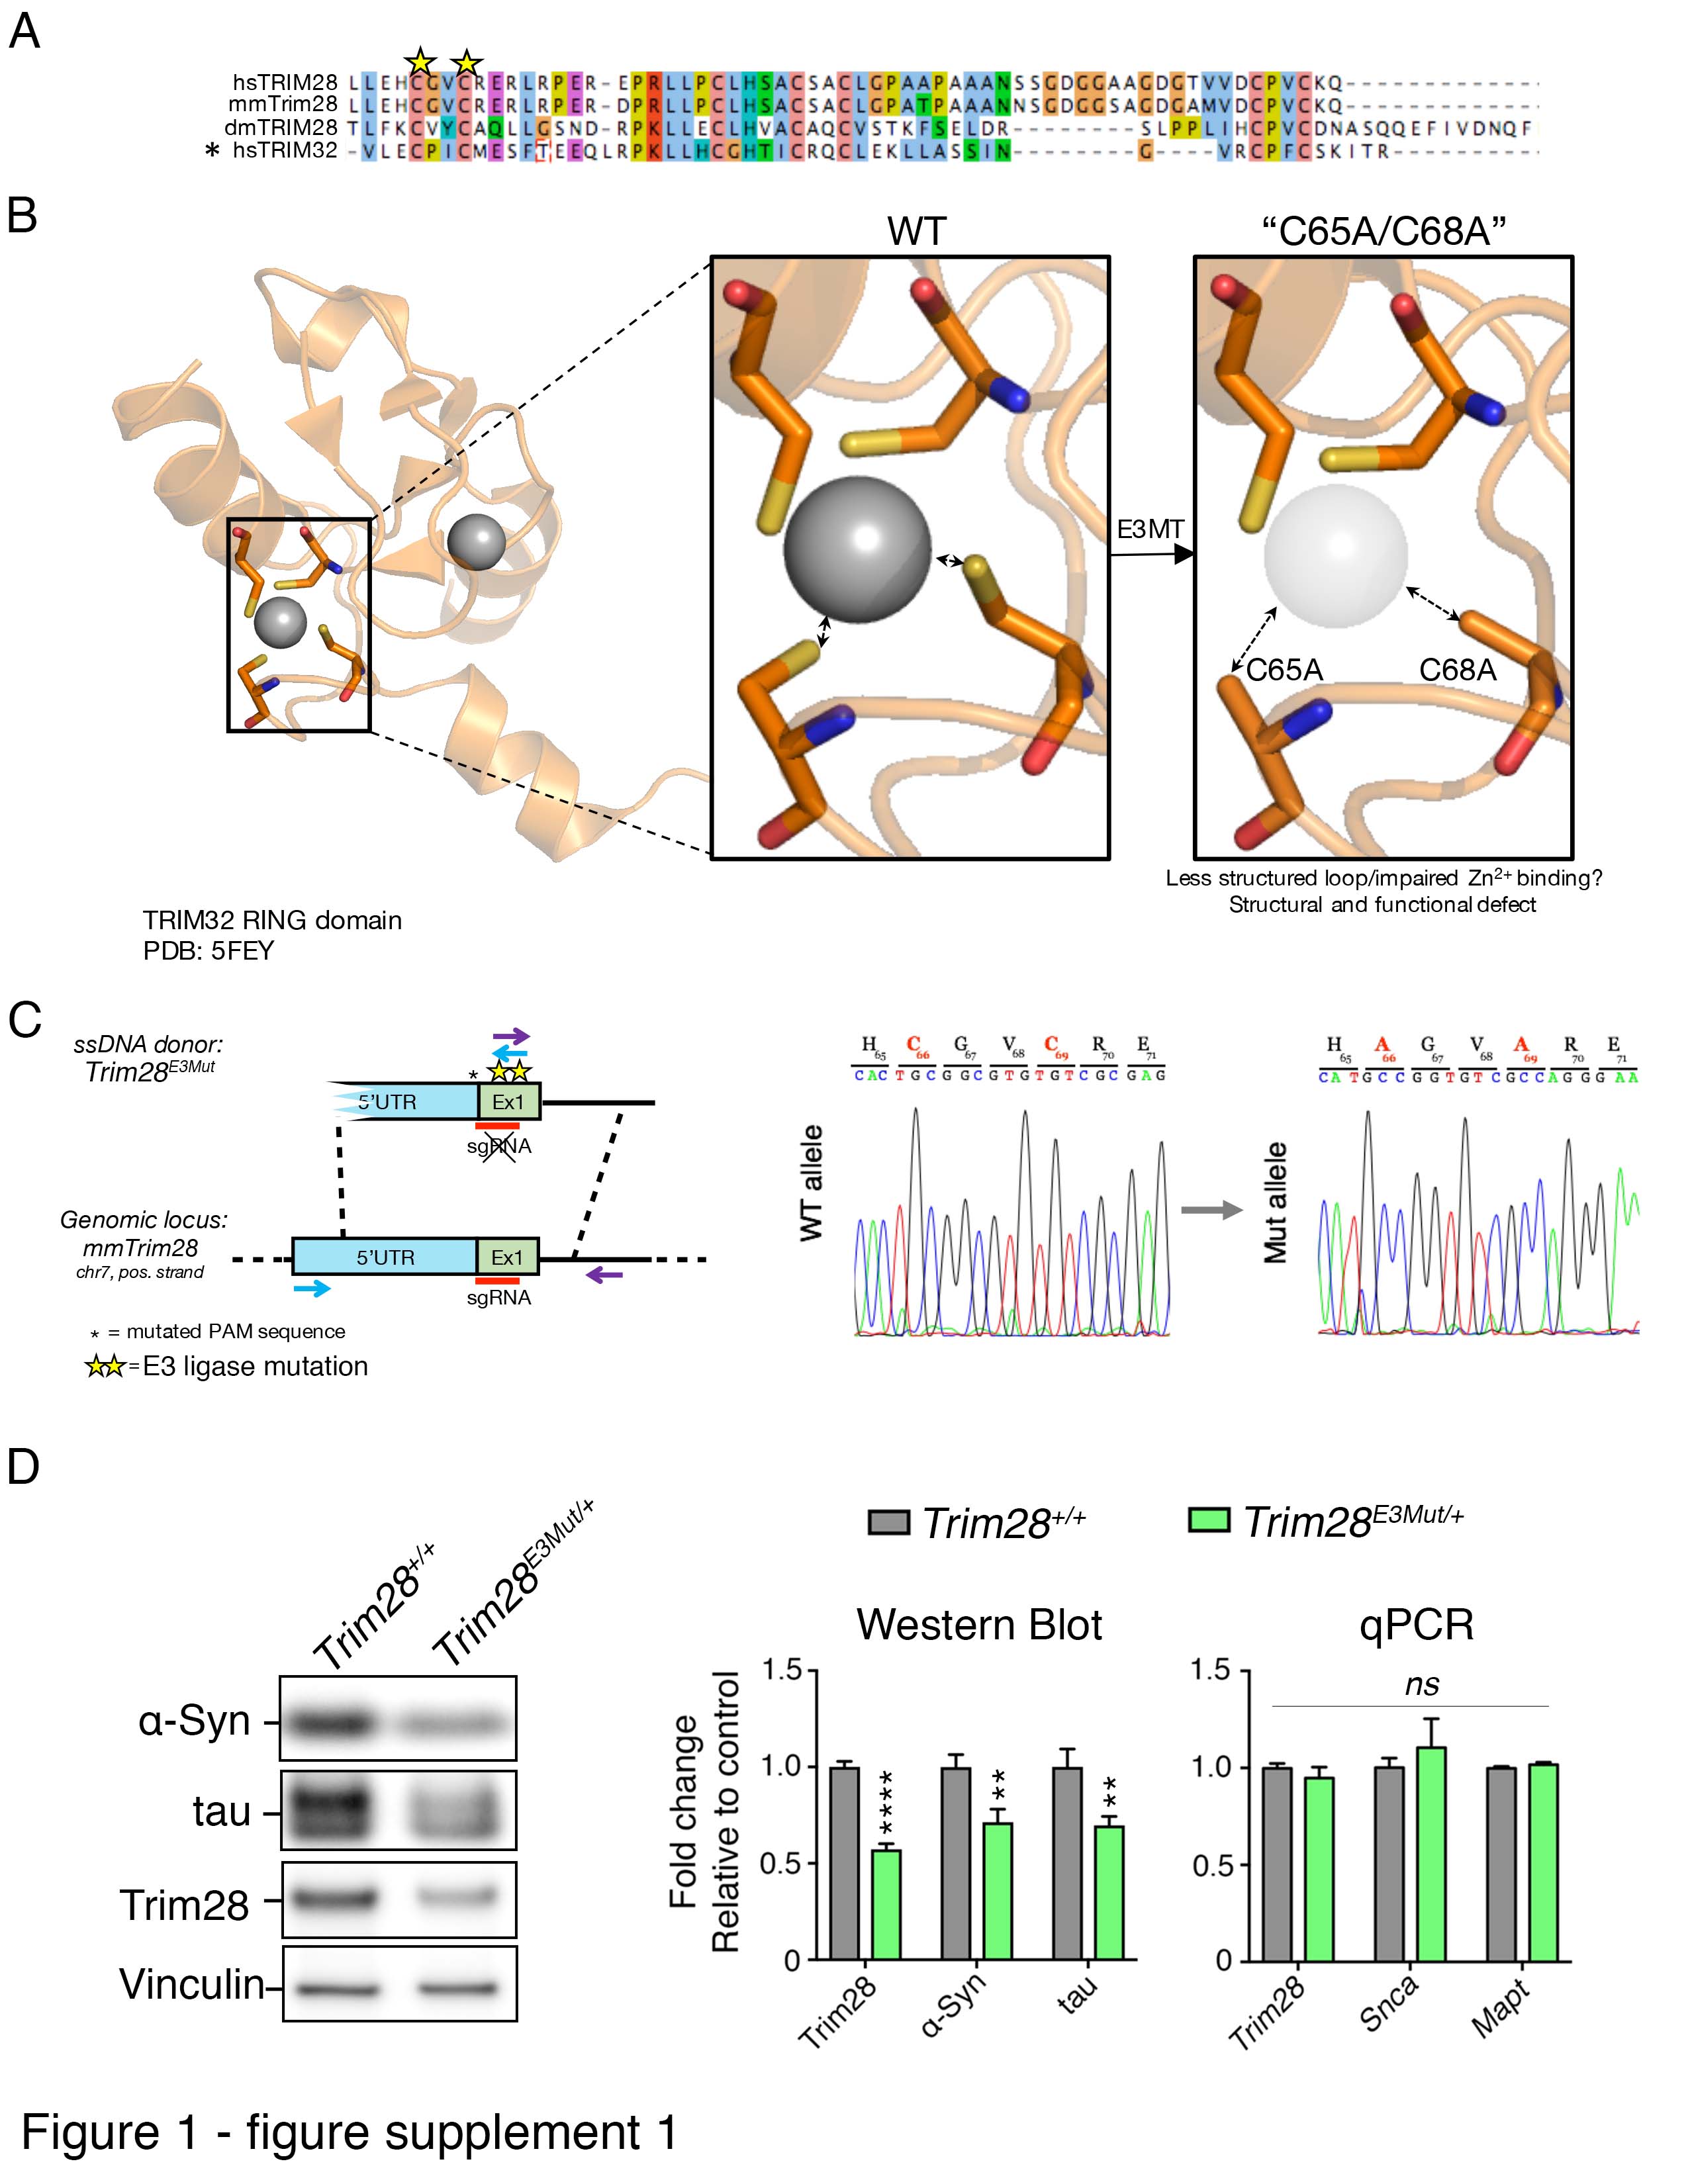

Supplement: supp [file elife-36768-supp-v1.zip › elife_poa_e36768_Figure_1_figure_supplement_1.jpg]

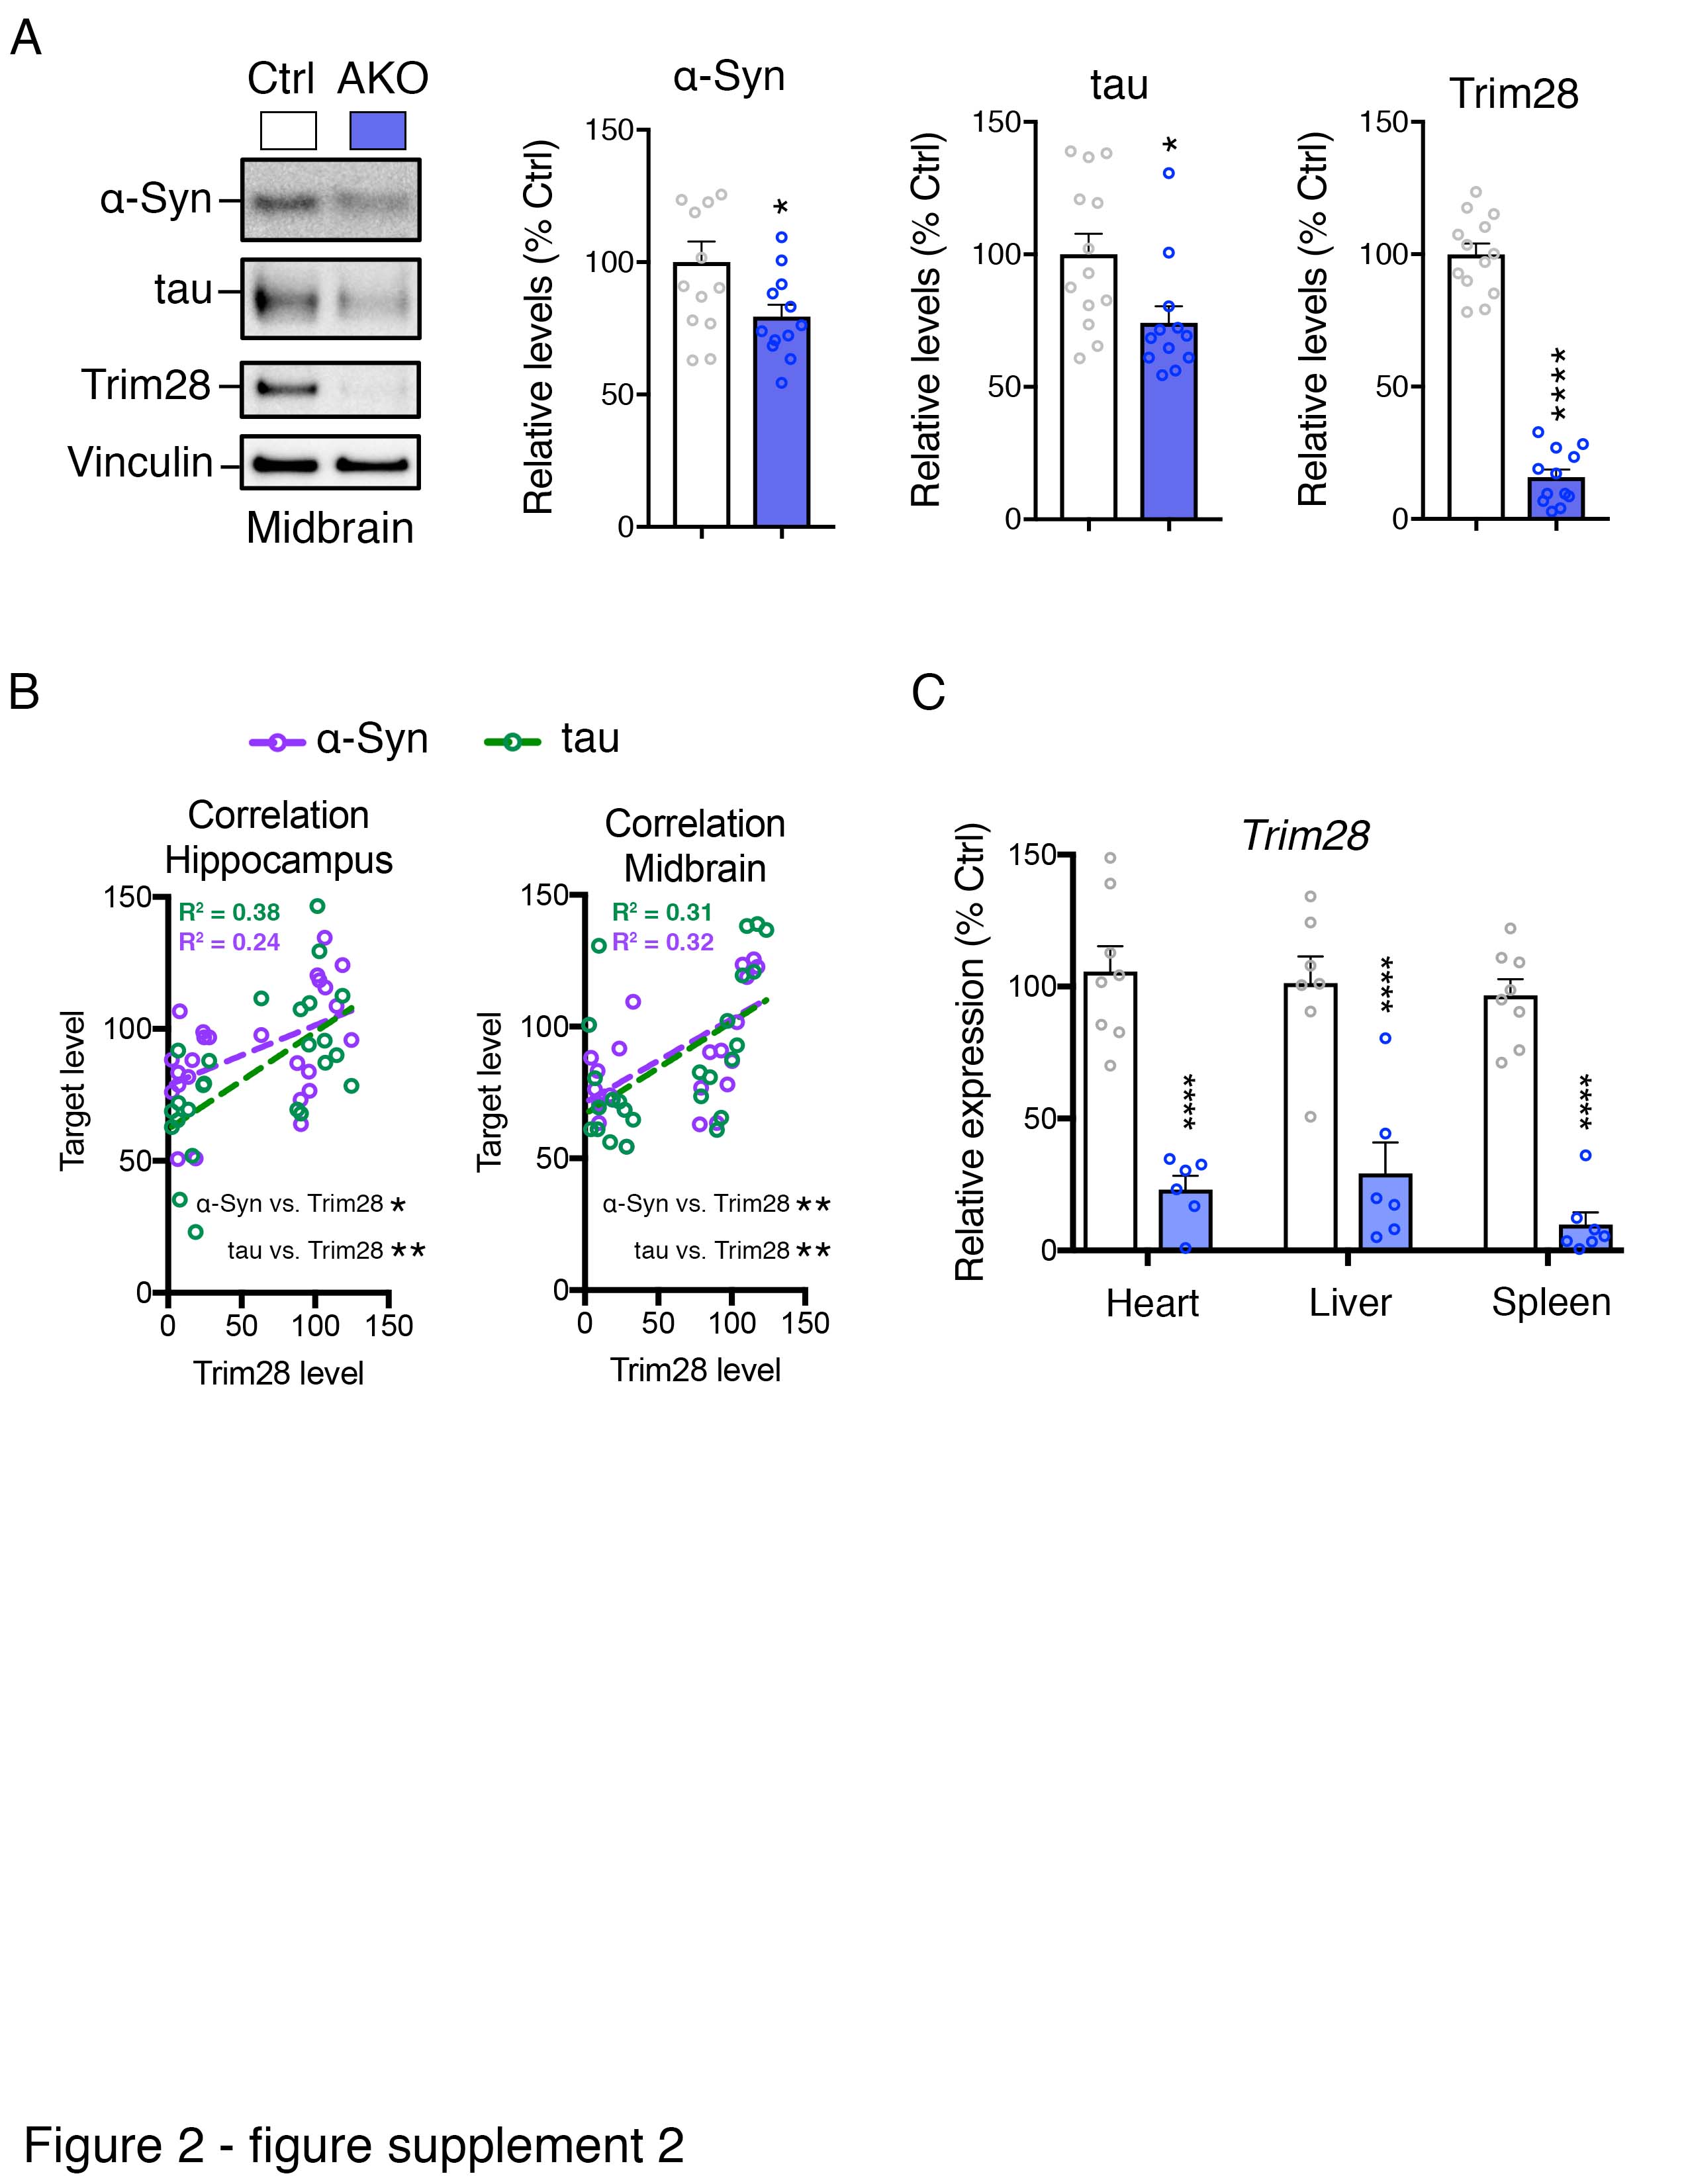

Supplement: supp [file elife-36768-supp-v1.zip › elife_poa_e36768_Figure_2_figure_supplement_2.jpg]

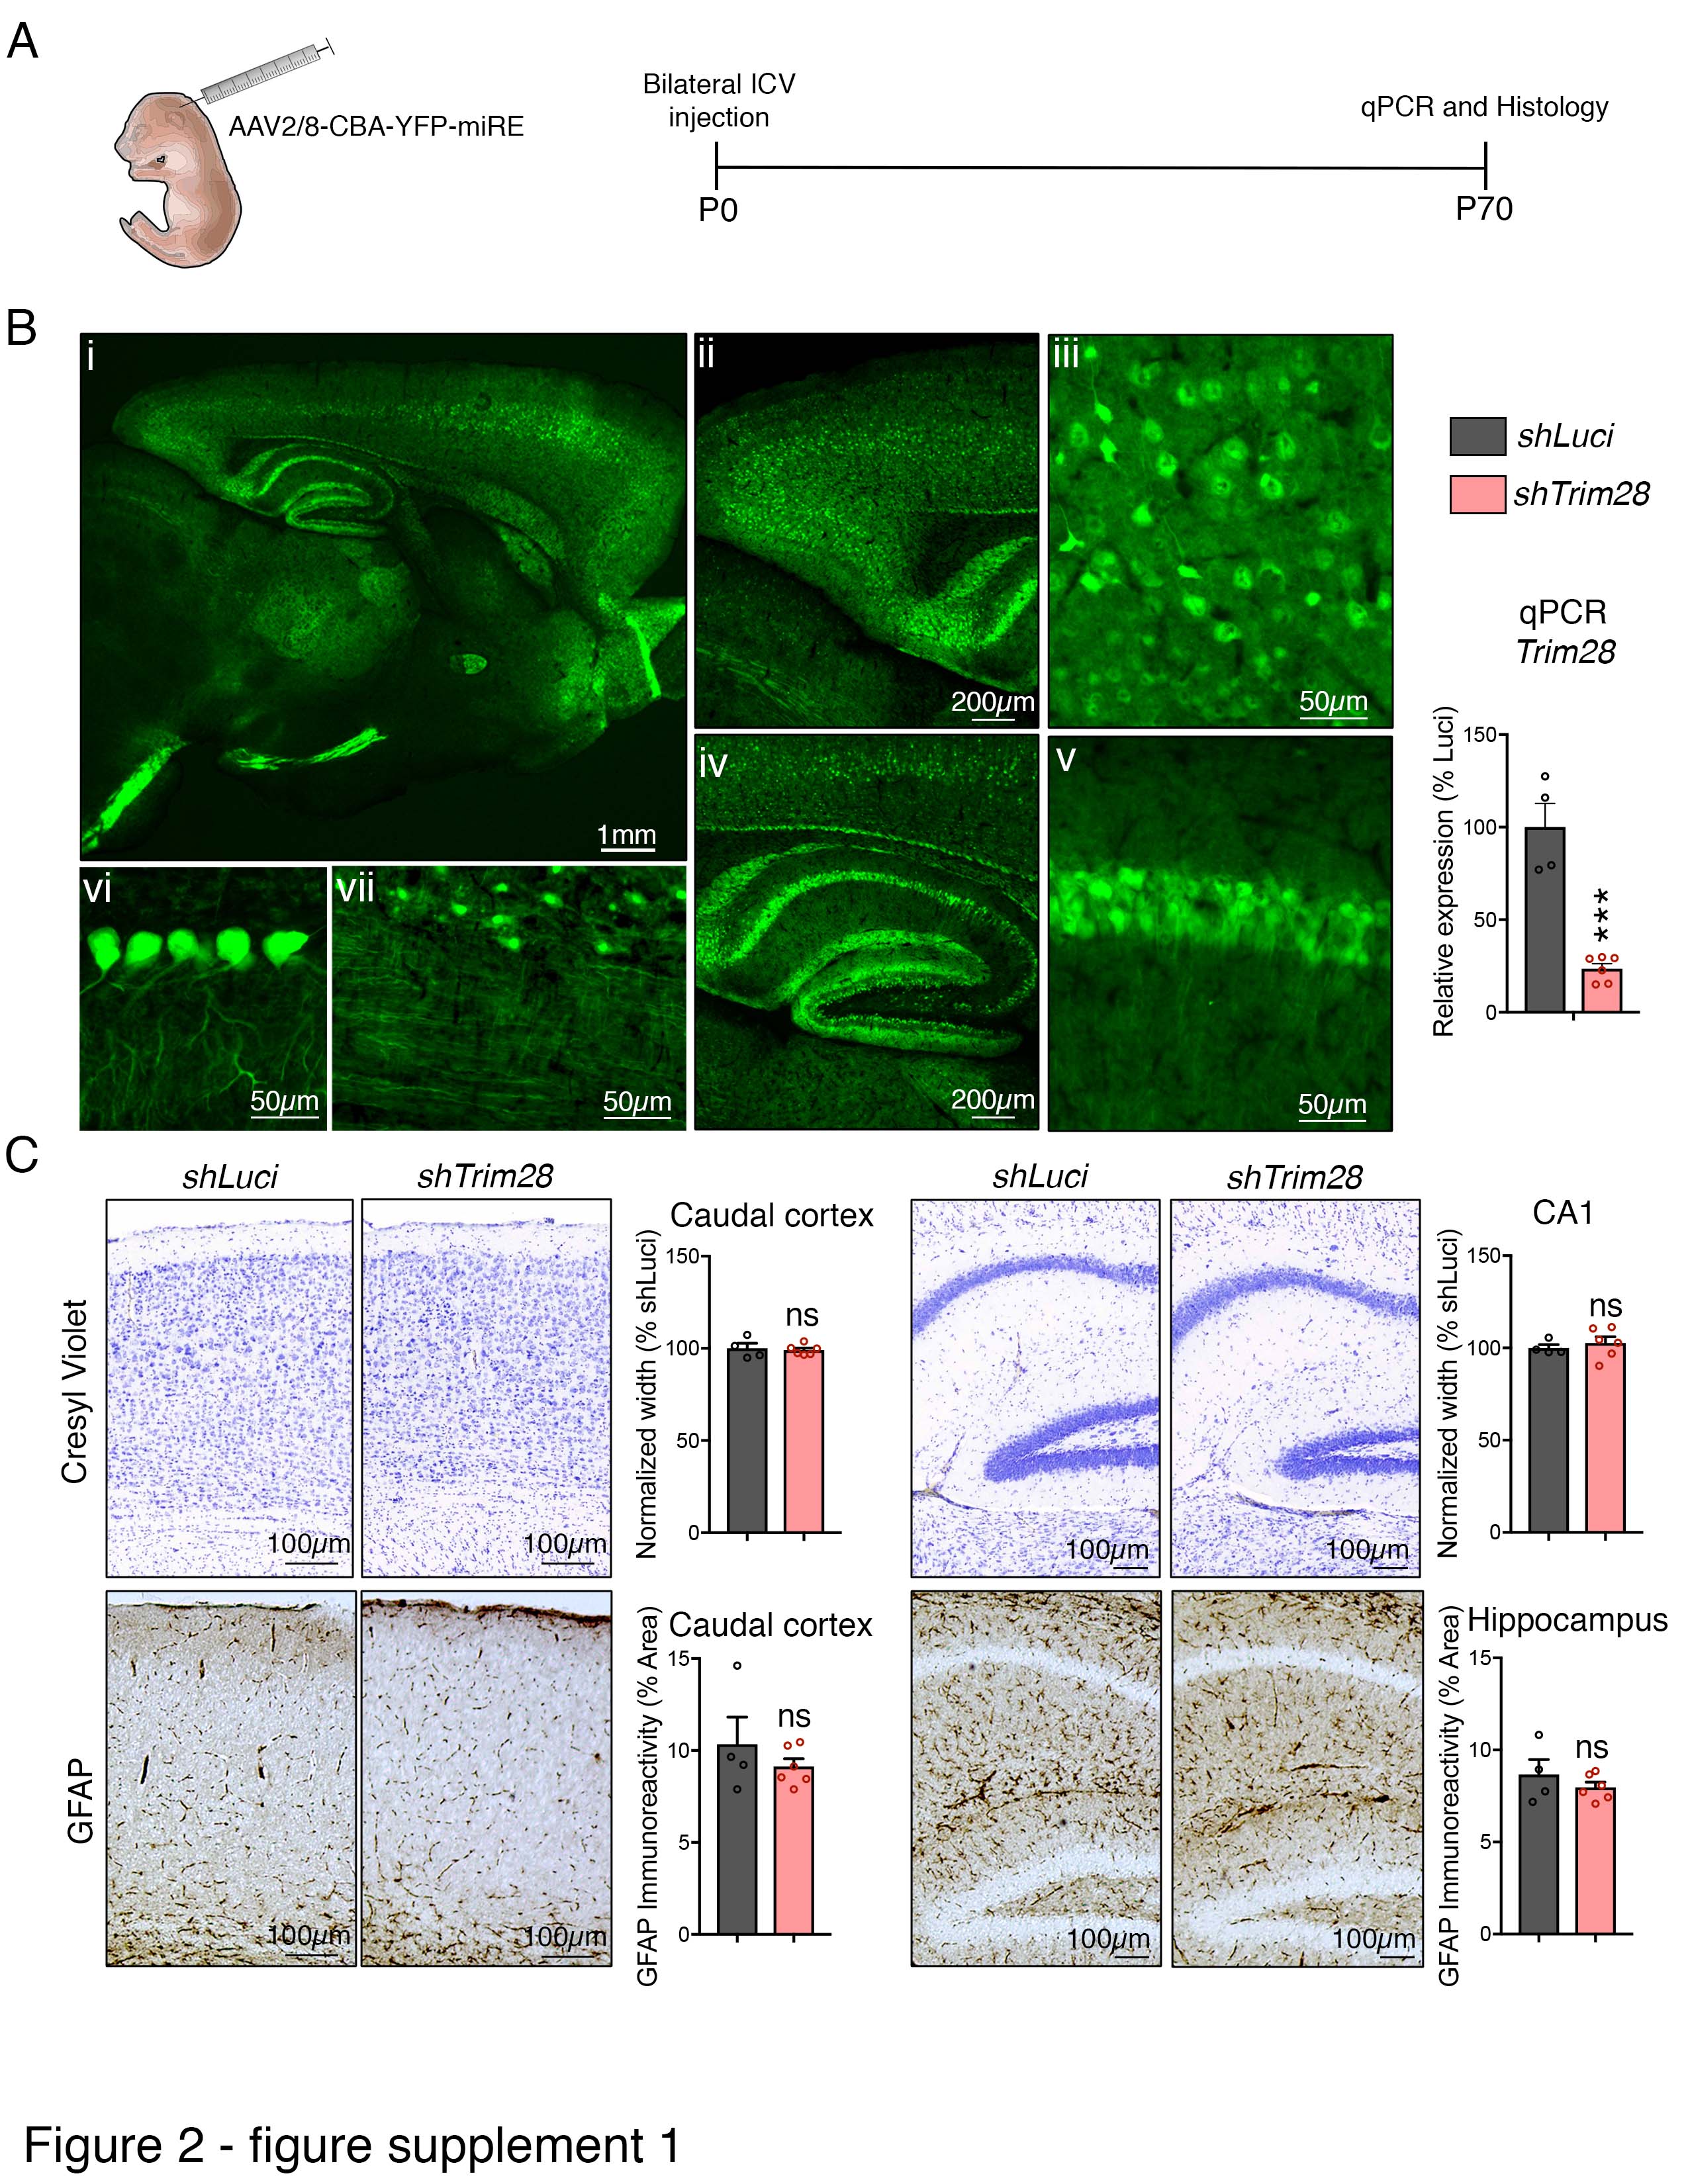

Supplement: supp [file elife-36768-supp-v1.zip › elife_poa_e36768_Figure_2_figure_supplement_1.jpg]

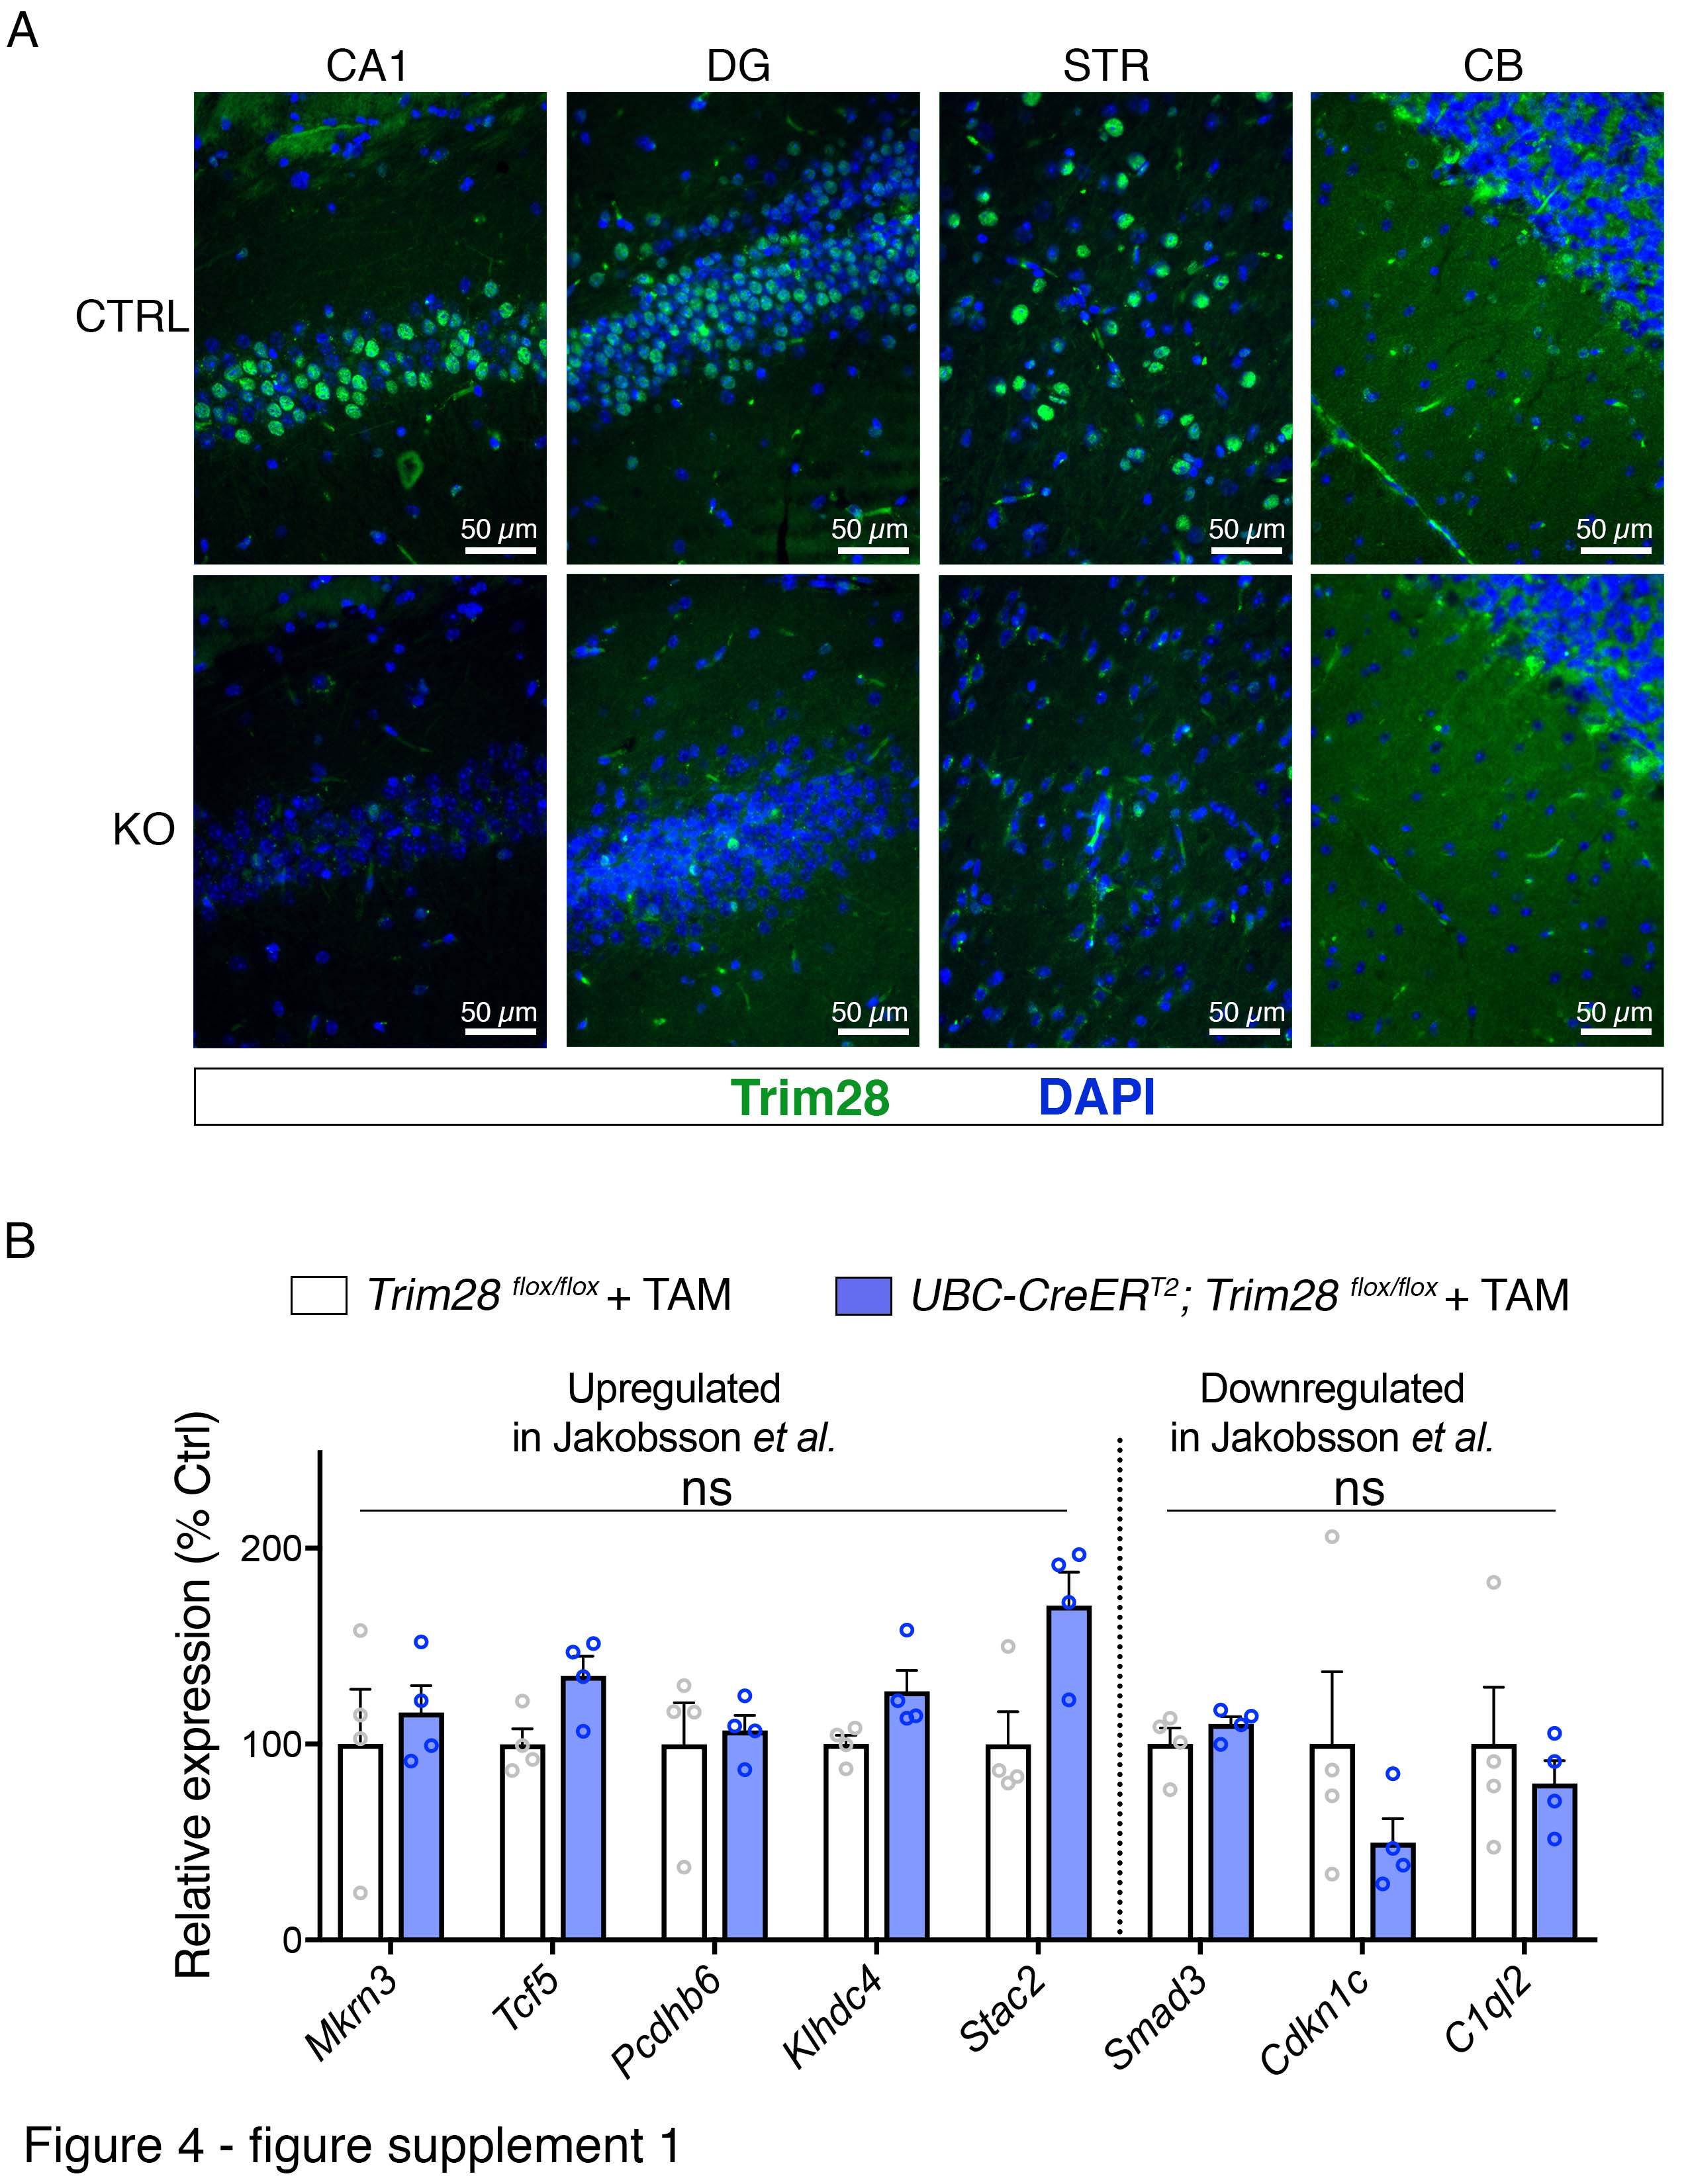

Supplement: supp [file elife-36768-supp-v1.zip › elife_poa_e36768_Figure_4_figure_supplement_1.jpg]
